# Supplementary material for: Cun+-assisted synthesis of multi- and single-phase yttrium oxide nanosheets
Source: Royal Society of Chemistry journal article supplement (doi:10.1039/c3tc31321b), 2013-01-01
Supplement: c3tc31321b.pdf [file c3tc31321b.pdf]

## Electronic Supplementary Information

# Cu<sup>n+</sup>-Assisted Synthesis of Multi- and Single-phase Yttrium Oxide Nanosheets

Xingliang He,<sup>a</sup> Yan Zhou,<sup>b</sup> Hong Liang<sup>\*ab</sup>

<sup>a</sup> Department of Mechanical Engineering, Texas A&M University, College Station, Texas  
77843, United States.

<sup>b</sup> Materials Science & Engineering, Texas A&M University, College Station, Texas 77843,  
United States.

\* Fax: +1 979-845-3081; Tel: +1 979-862-2623; E-mail: hliang@tamu.edu

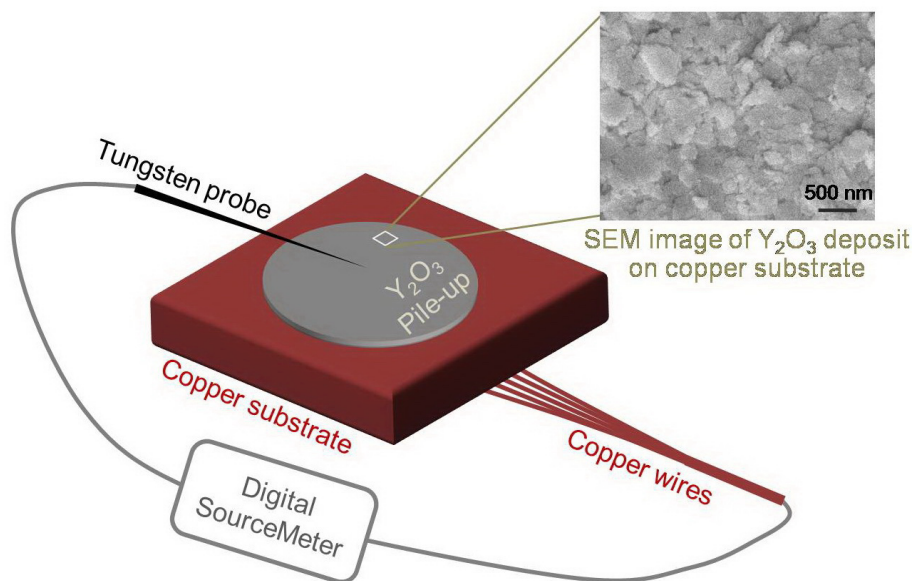

**Fig. S1** Schematic of the I-V setup.

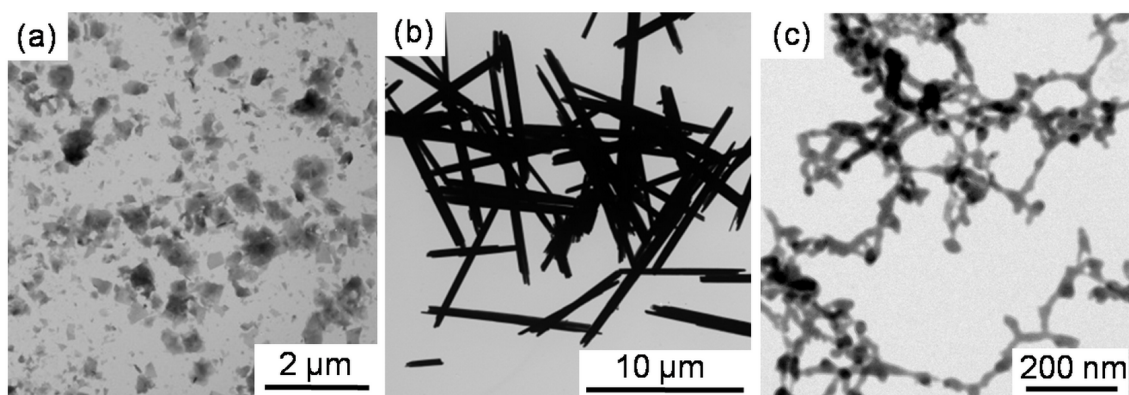

**Fig. S2** TEM images of the irregular  $Y_2O_3$  nanostructure (a) and the  $Y_2O_3$  nanowire (NW, b) synthesized at 80  $^{\circ}C$  and 240  $^{\circ}C$ , respectively. (c) TEM image of the commercial  $Y_2O_3$  powder.

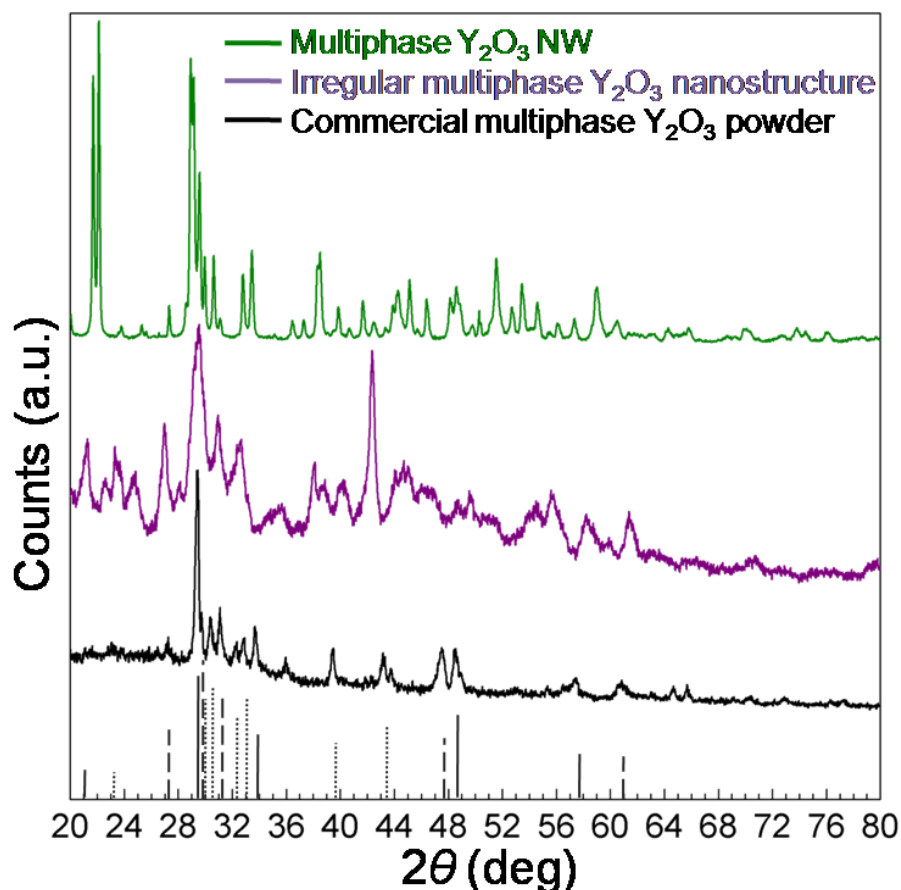

**Fig. S3** XRD patterns of the commercial multiphase  $Y_2O_3$  powder (bottom black pattern), the multiphase irregular  $Y_2O_3$  nanostructure (middle purple pattern), and the multiphase  $Y_2O_3$  NW (top green pattern). Three different phases present: cubic (labeled by solid line in JCPDS Files No. 41-1105), hexagonal (labeled by dashed line, JCPDS Files No. 20-1412), and monoclinic (labeled by dotted line, JCPDS Files No. 44-0399).

At high temperature (240 °C),  $Y_2O_3$  NS dissolves into the solution gradually, leading to nucleation of yttrium hydroxide again.<sup>1</sup> The nuclei evolve into one-dimensional multiphase crystals at nanoscale due to the high anisotropic structure along c-axis in hexagonal yttrium hydroxide. Surface energy reduces substantially due to elimination of the rigid lamellar structured interface.<sup>2</sup> This prompts the thermodynamic driving force to fuse and align nanocrystals together anisotropically.<sup>3</sup> One-dimensional hydroxide NWs form spontaneously. On the basis of our present results, it is difficult to address the growth mechanism of the NW

quantitatively and kinetically. Further investigations are being carried out to reveal the growth dynamics.

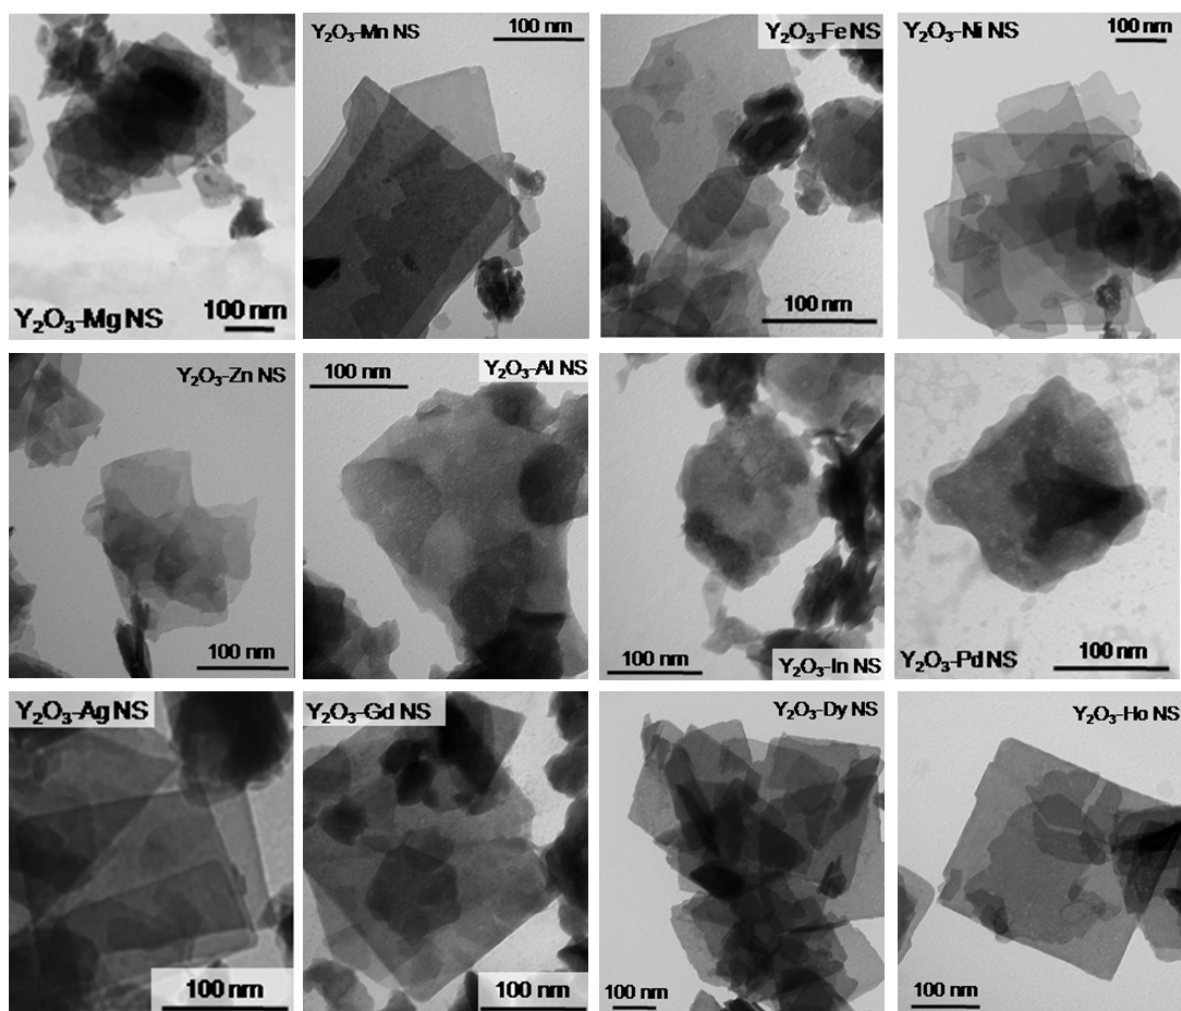

**Fig. S4** TEM images of multiphase  $Y_2O_3$  NS synthesized in the presences of the other metal ions.

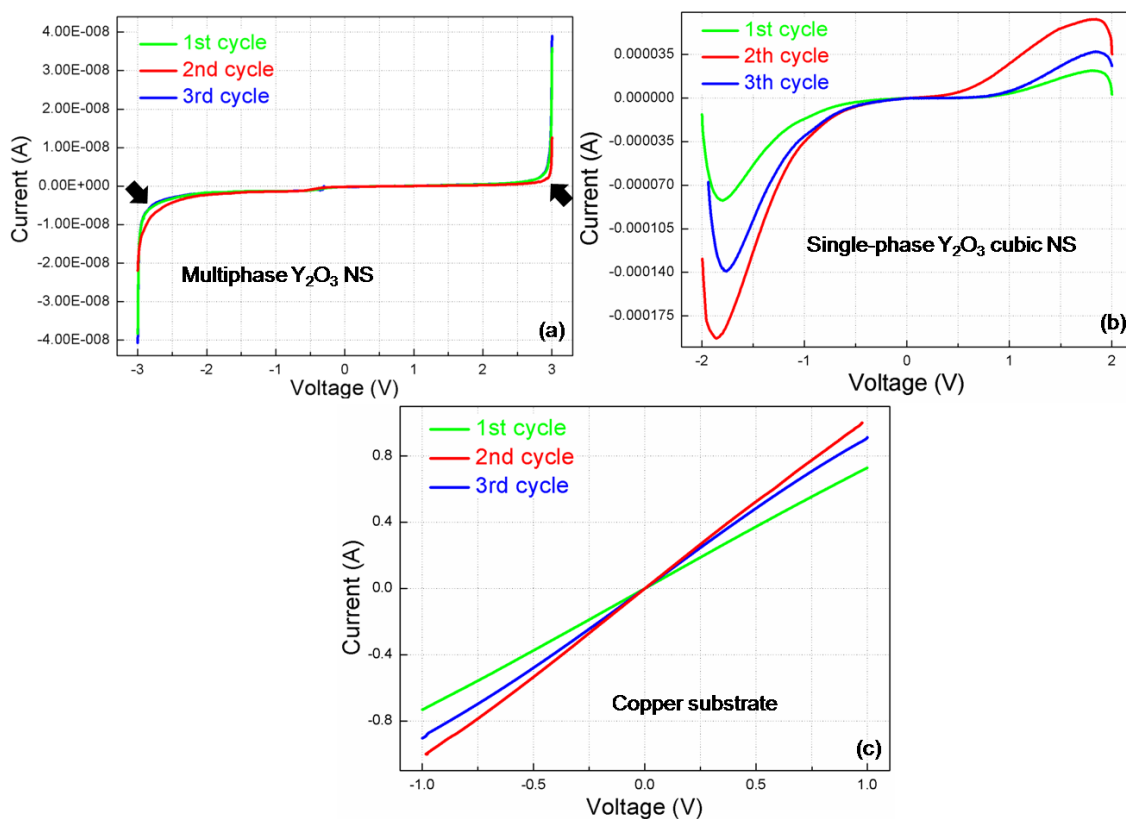

**Fig. S5** First three I-V measurements of the multiphase  $Y_2O_3$  NS (a), the single-phase cubic  $Y_2O_3$ -Cu NS (b), and the Cu substrate electrode (c).

The diode behavior and the negative-resistance performance are visible in our first three measurements. In Fig. S5a, the difference is observed in volt of -3 and -2 and 2.5 and 3 volts. In Fig. S5b, it shows more at -2 to -1 and 0.5 to 2 volts. In Fig. S5c, the slop of three plots is different. After examined all possible reasons, we believe that the difference is due to the unavoidable poor Ohmic contacts between the tungsten probe and the  $Y_2O_3$  samples.

### Supporting References

1. N. Li, K. Yanagisawa, N. Kumada, *Cryst. Growth Des.*, **9**, 2009, 978.
2. J. F. Banfield, S. A. Welch, H. Zhang, T. T. Ebert, R. L. Penn, *Science*, **289**, 2000, 751.
3. R. L. Penn, G. Oskam, T. J. Strathmann, P. C. Searson, A. T. Stone, D. R. Veblen, *J. Phys. Chem. B*, **105**, 2001, 2177.
